# Supplementary material for: Green Space Visits and Barriers to Visiting during the COVID-19 Pandemic: A Three-Wave Nationally Representative Cross-Sectional Study of UK Adults
Source: MDPI journal article supplement (doi:10.3390/land11040503), 2022-03-31
Supplement: s1 [file s1]

# Supplementary materials

Table S1. Weighted counts and percentages of demographic variables.

|                     |   | Weighted N/% |
|---------------------|---|--------------|
| <i>Wave</i>         |   |              |
| 1                   | N | 2252         |
|                     | % | 34           |
| 2                   | N | 2246         |
|                     | % | 33           |
| 3                   | N | 2215         |
|                     | % | 33           |
| <i>Sex</i>          |   |              |
| Male                | N | 3256         |
|                     | % | 49           |
| Female              | N | 3457         |
|                     | % | 52           |
| <i>Age group</i>    |   |              |
| 18-24               | N | 745          |
|                     | % | 11           |
| 25-64               | N | 4417         |
|                     | % | 66           |
| 65+                 | N | 1551         |
|                     | % | 23           |
| <i>Social grade</i> |   |              |
| Higher social grade | N | 3826         |
|                     | % | 57           |
| Lower social grade  | N | 2887         |
|                     | % | 43           |

**Table S2.** Significant interaction results by wave and socio-demographic variables; *Predicted Probabilities (95% Confidence Intervals)*.

| Significant interactions                           |                     | Wave             |                  |                  | Anova p-value |
|----------------------------------------------------|---------------------|------------------|------------------|------------------|---------------|
|                                                    |                     | 1                | 2                | 3                |               |
| Visits to green space                              |                     |                  |                  |                  |               |
| Social grade                                       | Higher social grade | 0.53 (0.50-0.56) | 0.73 (0.70-0.75) | 0.73 (0.71-0.76) | 0.003         |
|                                                    | Lower social grade  | 0.44 (0.41-0.47) | 0.55 (0.51-0.58) | 0.61 (0.58-0.64) |               |
| Green spaces are too busy                          |                     |                  |                  |                  |               |
| Sex                                                | Male                | 0.06 (0.04-0.08) | 0.08 (0.06-0.11) | 0.18 (0.15-0.21) | 0.03          |
|                                                    | Female              | 0.11 (0.09-0.14) | 0.10 (0.08-0.12) | 0.18 (0.15-0.22) |               |
| Age                                                | 18-24               | 0.13 (0.08-0.20) | 0.06 (0.03-0.12) | 0.22 (0.15-0.31) | 0.009         |
|                                                    | 25-64               | 0.10 (0.08-0.12) | 0.10 (0.08-0.12) | 0.18 (0.15-0.21) |               |
|                                                    | 65+                 | 0.04 (0.02-0.06) | 0.09 (0.06-0.13) | 0.18 (0.14-0.24) |               |
| Worried about social distancing                    |                     |                  |                  |                  |               |
| Age                                                | 18-24               | 0.28 (0.20-0.36) | 0.15 (0.10-0.23) | 0.13 (0.08-0.21) | 0.01          |
|                                                    | 25-64               | 0.27 (0.24-0.31) | 0.13 (0.11-0.16) | 0.13 (0.11-0.16) |               |
|                                                    | 65+                 | 0.18 (0.14-0.23) | 0.17 (0.13-0.23) | 0.17 (0.13-0.23) |               |
| Higher risk of being severely affected by Covid-19 |                     |                  |                  |                  |               |
| Age                                                | 18-24               | 0.25 (0.18-0.33) | 0.09 (0.05-0.16) | 0.03 (0.07-0.09) | 0.01          |
|                                                    | 25-64               | 0.20 (0.17-0.23) | 0.13 (0.10-0.15) | 0.08 (0.06-0.11) |               |
|                                                    | 65+                 | 0.42 (0.37-0.48) | 0.24 (0.18-0.29) | 0.10 (0.07-0.14) |               |
| Fear for health                                    |                     |                  |                  |                  |               |
| Age                                                | 18-24               | 0.28 (0.20-0.36) | 0.14 (0.09-0.22) | 0.03 (0.01-0.09) | 0.04          |
|                                                    | 25-64               | 0.26 (0.23-0.29) | 0.11 (0.09-0.14) | 0.10 (0.08-0.13) |               |
|                                                    | 65+                 | 0.31 (0.26-0.37) | 0.20 (0.15-0.25) | 0.14 (0.10-0.19) |               |
| Not interested                                     |                     |                  |                  |                  |               |
| Age                                                | 18-24               | 0.17 (0.11-0.24) | 0.15 (0.09-0.22) | 0.07 (0.03-0.13) | <0.001        |
|                                                    | 25-64               | 0.07 (0.05-0.09) | 0.07 (0.05-0.09) | 0.10 (0.08-0.12) |               |
|                                                    | 65+                 | 0.04 (0.03-0.07) | 0.12 (0.08-0.17) | 0.11 (0.07-0.15) |               |

**Table S3.** Significant interaction results by wave and socio-demographic variables, each interaction model was adjusted for wave, sex, age and social grade; Interaction Odds Ratios (95% Confidence Intervals),  $p < 0.05$ .

|                                                    |         | Wave             |                  |
|----------------------------------------------------|---------|------------------|------------------|
|                                                    | 1 (ref) | 2                | 3                |
| Social grade                                       |         |                  |                  |
| Visits to green space                              |         |                  |                  |
| Higher social grade (ref)                          | -       | -                | -                |
| Lower social grade                                 | -       | 0.65 (0.51-0.84) | 0.82 (0.64-1.05) |
| p-value                                            | -       | <0.001           | 0.12             |
| Sex                                                |         |                  |                  |
| Busy green space                                   |         |                  |                  |
| Male (ref)                                         | -       | -                | -                |
| Female                                             | -       | 0.61 (0.33-1.15) | 0.49 (0.28-0.86) |
| p-value                                            | -       | 0.12             | 0.01             |
| Age                                                |         |                  |                  |
| Busy green space                                   |         |                  |                  |
| 18-24                                              | -       | 0.45 (0.16-1.23) | 0.98 (0.45-2.15) |
| p-value                                            | -       | 0.12             | 0.96             |
| 25-64 (ref)                                        | -       | -                | -                |
| 65+                                                | -       | 2.58 (1.11-5.98) | 2.97 (1.38-6.40) |
| p-value                                            | -       | 0.03             | 0.01             |
| Worried about social distancing                    |         |                  |                  |
| 18-24                                              | -       | 1.16 (0.57-2.36) | 0.99 (0.47-2.06) |
| p-value                                            | -       | 0.68             | 0.97             |
| 25-64 (ref)                                        | -       | -                | -                |
| 65+                                                | -       | 2.21 (1.30-3.76) | 2.27 (1.34-3.87) |
| p-value                                            | -       | 0.00             | 0.00             |
| Higher risk of being severely affected by Covid-19 |         |                  |                  |
| 18-24                                              | -       | 0.50 (0.22-1.14) | 0.30 (0.09-0.95) |
| p-value                                            | -       | 0.10             | 0.04             |
| 25-64 (ref)                                        | -       | -                | -                |
| 65+                                                | -       | 0.72 (0.45-1.17) | 0.41 (0.23-0.75) |
| p-value                                            | -       | 0.18             | 0.00             |
| Fear for health                                    |         |                  |                  |
| 18-24                                              | -       | 1.17 (0.56-2.41) | 0.27 (0.09-0.86) |
| p-value                                            | -       | 0.68             | 0.03             |
| 25-64 (ref)                                        | -       | -                | -                |
| 65+                                                | -       | 1.47 (0.89-2.42) | 1.10 (0.64-1.89) |
| p-value                                            | -       | 0.13             | 0.72             |
| Not interested                                     |         |                  |                  |
| 18-24                                              | -       | 0.91 (0.40-2.06) | 0.25 (0.10-0.65) |
| p-value                                            | -       | 0.82             | 0.00             |
| 25-64 (ref)                                        | -       | -                | -                |
| 65+                                                | -       | 3.12 (1.42-6.88) | 1.78 (0.81-3.89) |
| p-value                                            | -       | 0.00             | 0.15             |
